# Supplementary material
Source: Springer Nature journal article supplement (https://www.springermedizin.de/resource/supplementary/12967_2011_799_MOESM1_ESM.pdf/9577054)
Supplement: MOESM1 [file 9577054]

---

**Pulmonary toxicity**

---

PaO<sub>2</sub>/FiO<sub>2</sub> ratio < 200 (days 1, 2, 3, and 4)

---

FEV<sub>1</sub> (days 10 and 30)

---

Re-intubation after 48 h post extubation

---

Lung embolism assessed according to the European guidelines [50]

---

**Portal infusional toxicity**

---

Portal vein flow V<sub>max</sub> [cm/s] = 0

---

Resistive Index RI ≥ 1

---

Retrograde arterial flow

---

Arterial occlusion

---

Venous occlusion

---

RI < 0.5 and Systolic Acceleration Time (SAT) > 0.08 s

---

**Systemic toxicity**

---

Anaphylactic shock

---
